# Supplementary material for: Comparative Genomic Analysis of the Genus Nocardiopsis Provides New Insights into Its Genetic Mechanisms of Environmental Adaptability
Source: PLoS One. 2013 Apr 23;8(4):e61528. doi: 10.1371/journal.pone.0061528 (PMC3634020; doi:10.1371/journal.pone.0061528)
Supplement: Table S4 — Distribution of ABC transport family among core paralogous proteins in Nocardiopsis genomes. (XLS) [file pone.0061528.s006.xls]

## Sheet: Tabl3 S4
Table S4. Distribution of ABC transport family among core paralogous proteins in Nocardiopsis genomes.
ABC family	Genome
	N. alba	N. alkaliphila	N. baichengensis	N. chromatogenes	N. dassonvillei	N. ganjiahuensis	N. gilva	N. halophila	N. halotolerans	N. kunsanensis	N. lucentensis	N. potens	N. prasina	N. salina	N. synnemataformans	N. valliformis	N. xinjiangensis
3.A.1.1	14	20	29	35	26	37	20	28	23	13	14	20	24	26	26	27	18
3.A.1.101	0	0	0	0	0	1	0	0	0	0	0	0	0	0	0	0	0
3.A.1.102	0	0	1	0	0	0	0	1	0	1	1	1	0	0	0	1	0
3.A.1.105	4	5	1	2	4	8	3	2	3	4	4	3	6	2	4	8	4
3.A.1.106	0	0	0	0	1	0	1	0	1	0	2	0	0	0	1	1	0
3.A.1.109	0	0	0	0	0	0	0	0	0	0	0	0	0	0	1	0	0
3.A.1.111	0	0	0	1	0	0	0	0	0	0	0	1	0	0	0	0	0
3.A.1.117	0	0	0	1	0	0	0	0	0	2	0	0	0	0	0	0	0
3.A.1.119	6	5	2	2	4	6	4	2	4	2	5	2	5	2	6	6	2
3.A.1.12	5	4	5	5	2	5	3	5	2	5	4	5	5	6	2	5	5
3.A.1.120	2	1	2	2	4	3	1	2	5	2	2	3	2	2	3	2	2
3.A.1.122	1	3	3	2	2	2	4	1	2	1	3	2	5	1	2	2	1
3.A.1.124	2	1	0	1	3	3	2	2	5	4	0	5	0	3	4	1	6
3.A.1.125	1	1	0	0	0	1	0		1	1	0	1	0	1	1	1	1
3.A.1.126	0	1	1		2	2	1	1	2	2	1	1	1	1	2	1	2
3.A.1.129	2	1	2	1	2	2	2	2	2	2	1	2	2	1	2	2	2
3.A.1.13	0	0	0	0	0	0	0	0	0	0	0	1	0	0	0	0	0
3.A.1.131	2	1	1	3	4	3	1	1	2		0	1	1	1	4	2
3.A.1.132	1	1	1	2	1	2	2	2	3	2	2	2	1	1	1	3	2
3.A.1.134	0	0	0	0	1	0	0	0	1	0	0	0	0	0	1	0	0
3.A.1.137	1	0	0	0	0	0	0	0	0	0	0	0	0	0	0	0	0
3.A.1.14	17	9	14	17	18	14	9	15	15	11	15	15	13	12	19	21	12
3.A.1.15	2	1	2	2	2	2	1	2	1	2	1	2	2	1	2	2	1
3.A.1.16	1	2	1	1	2	4	3	1	1	1	2	2	6	4	1	3	1
3.A.1.17	4	5	2	2	2	7	3	2	3	1	2	1	7	3	3	4	1
3.A.1.18	0	0	1	0	0	0	0	0	0	0	0	0	0	0	0	0	0
3.A.1.2	6	6	8	14	13	21	5	8	12	10	8	9	13	10	15	18	14
3.A.1.21	0	0	1	0	0	0	0	1	0	0	0	0	0	0	0	1	0
3.A.1.208	0	0	0	0	0	0	0	0	1	0	0	0	0	0	0	1	0
3.A.1.201	0	1		1	0	1	1	0	0	0	1		0	1	0	0
3.A.1.210	0	0	0	0	0	0	0	0	0	0	1	0	0	0	0	0	0
3.A.1.23	0	0		1	0	0	1	0	0	0	1	0	0	1	0	0	0
3.A.1.24	1	0	0	0	0	0	0	0	0	0	0	0	0	0	0	0	0
3.A.1.25	1	1	2	2	1	1	1	2	1	1	1	1	0	1	1	1	1
3.A.1.26	0	0	0	0	0	1	0	0	0	0	0	0	0	0	0	0	1
3.A.1.3	7	6	6	6	7	7	7	4	7	4	7	8	10	4	7	7	8
3.A.1.30	0	0	0	0	0	0	1	0	0	0	0	0	0	0	0	0	0
3.A.1.31	0	0	0	1	0	0	0	0	0	0	0	0	1	1	0	0	0
3.A.1.32	1	1	2	1	1	1	0	2	1	1	1	1	1	1	1	1	1
3.A.1.33	0	0	0	0	0	0	1	0	0	1	0	0	0	0	0	0	0
3.A.1.4	1	3	3	4	2	3	1	3	3	3	3	3	3	4	3	3	3
3.A.1.5	18	18	17	16	18	22	16	17	11	13	18	15	20	16	19	20	16
3.A.1.7	1	1	0	0	1	2	0	0	0	1	1	1	1	1	1	1	1
